# Supplementary material for: Inhibition of Rho-Associated Kinase 1/2 Attenuates Tumor Growth in Murine Gastric Cancer
Source: PubMed Central journal article supplement — Neoplasia. 2016 Sep 9;18(8):500–11. doi: 10.1016/j.neo.2016.07.002 (PMC5018096; doi:10.1016/j.neo.2016.07.002), 2016-09-09

**A**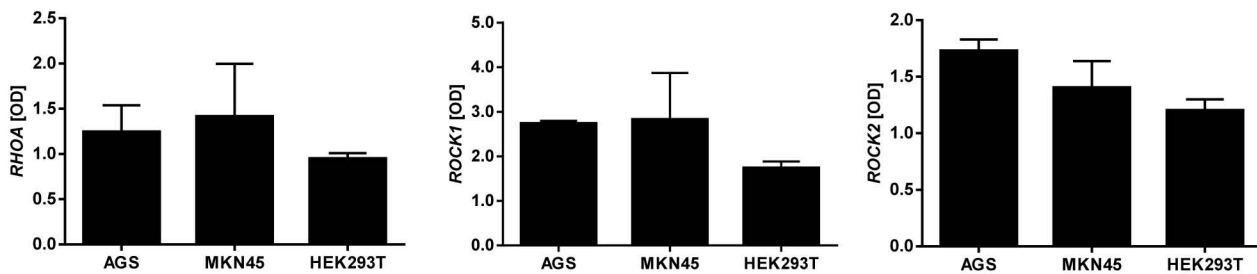**B**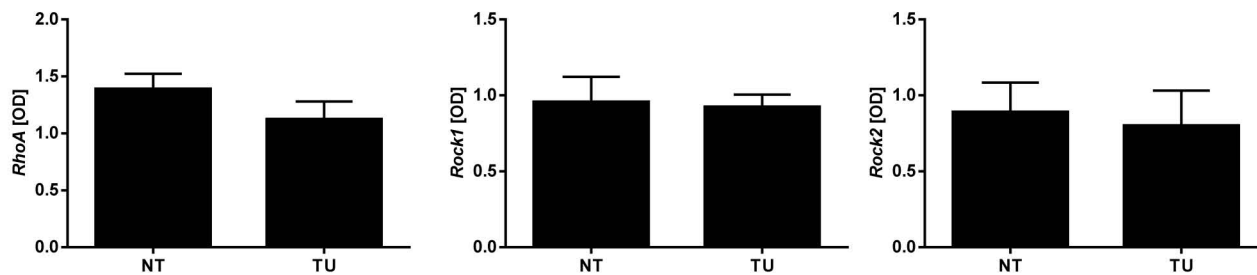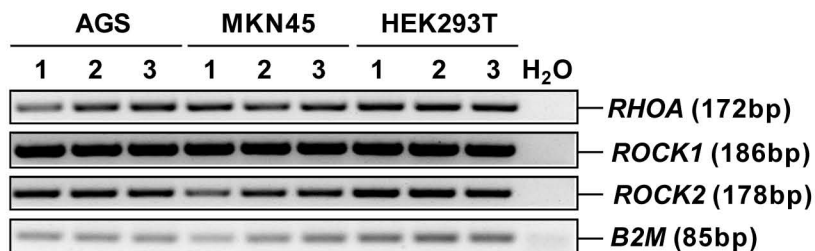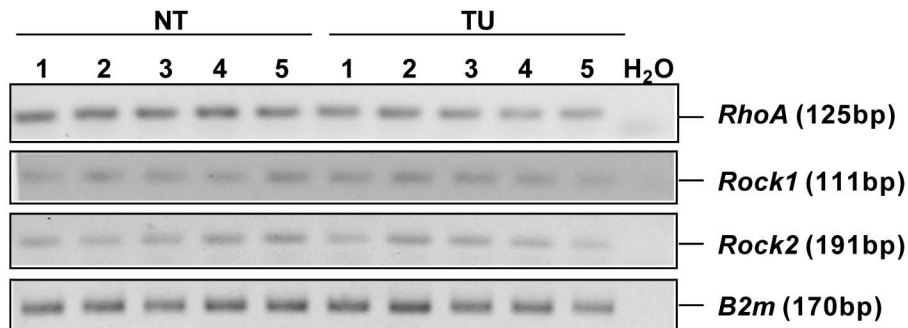

**A****Tumor (control)****Tumor (Fasudil 30 min)****MS**  
*m/z* 292.1 Da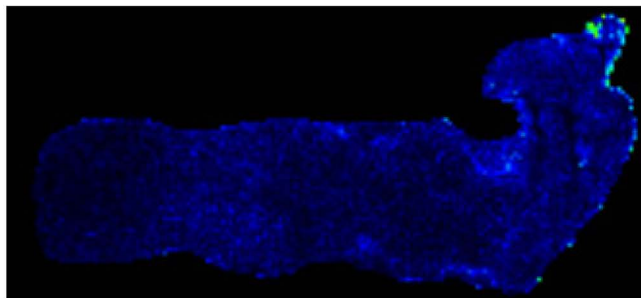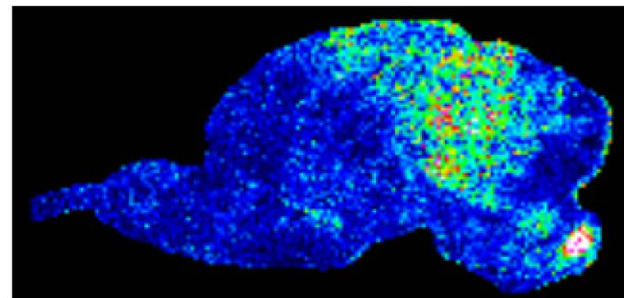**MS/MS**  
*m/z* 99 Da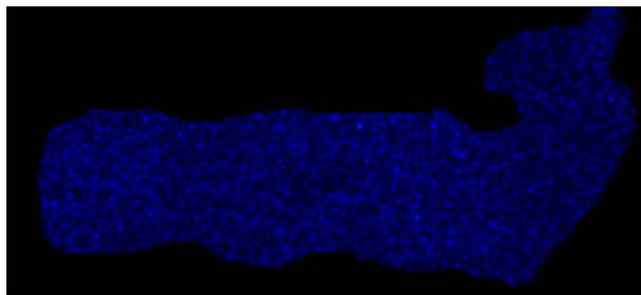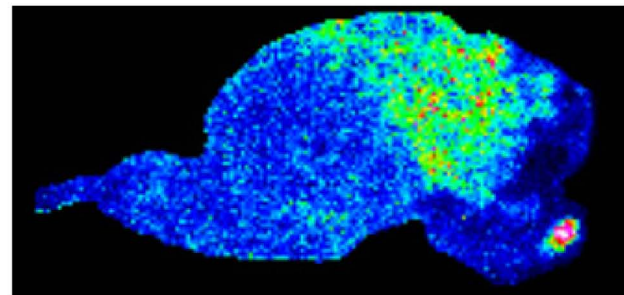**B**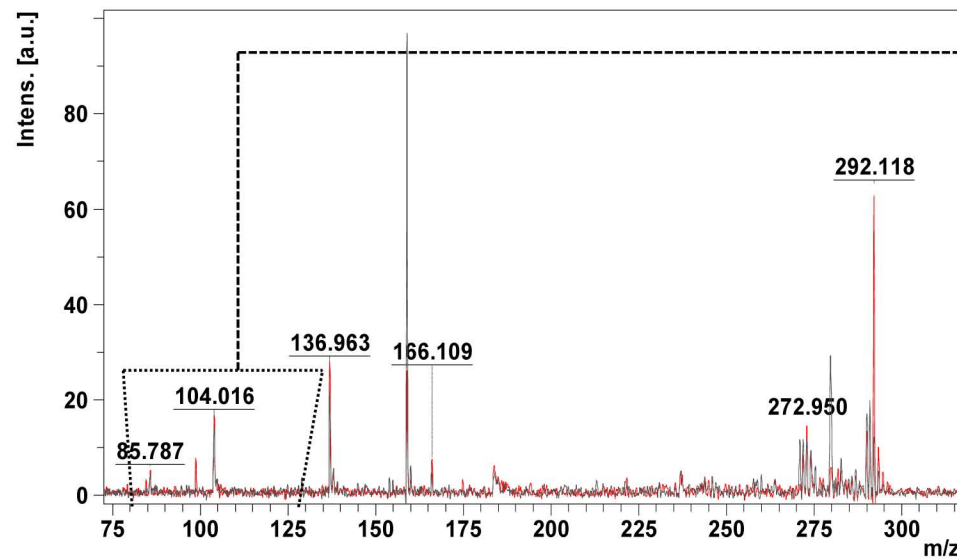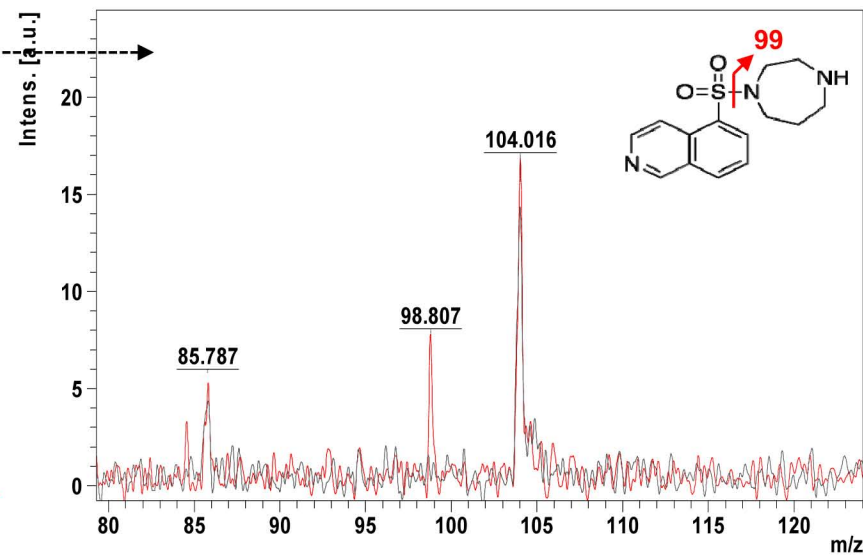

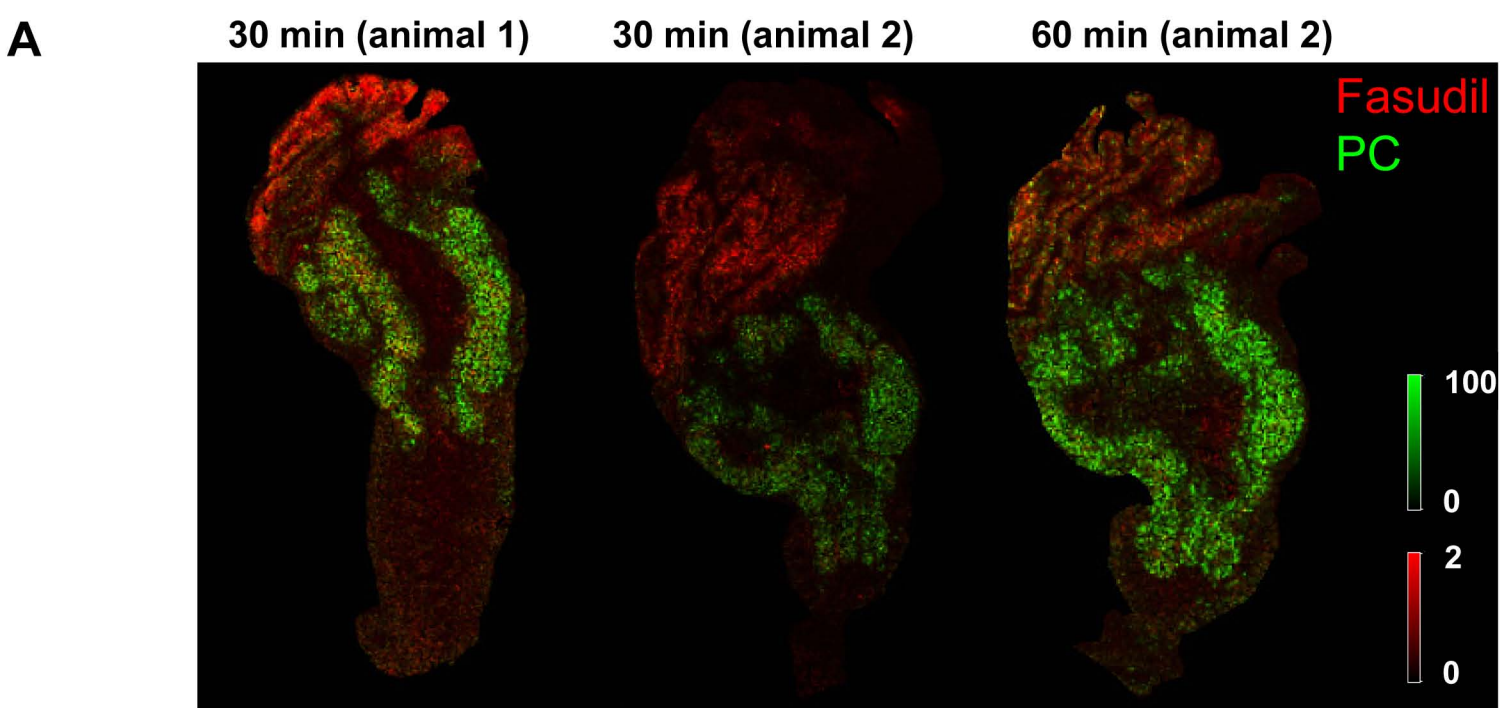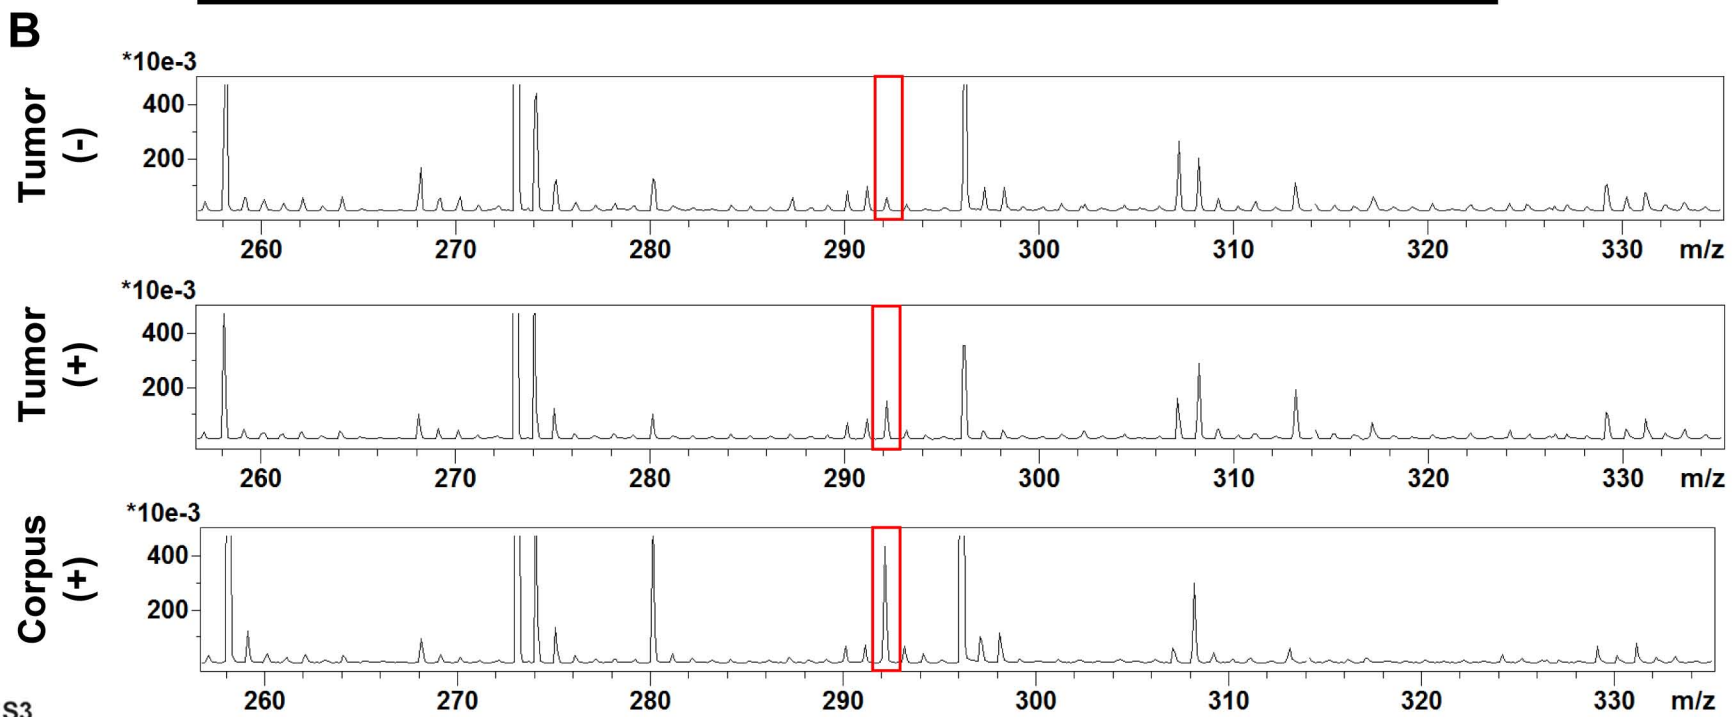

$m/z$  798.541

[PC (16:0/18:1) + K]<sup>+</sup>

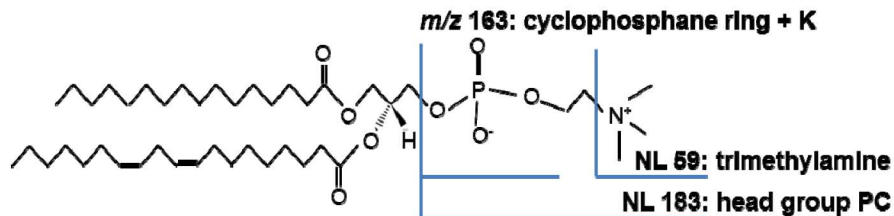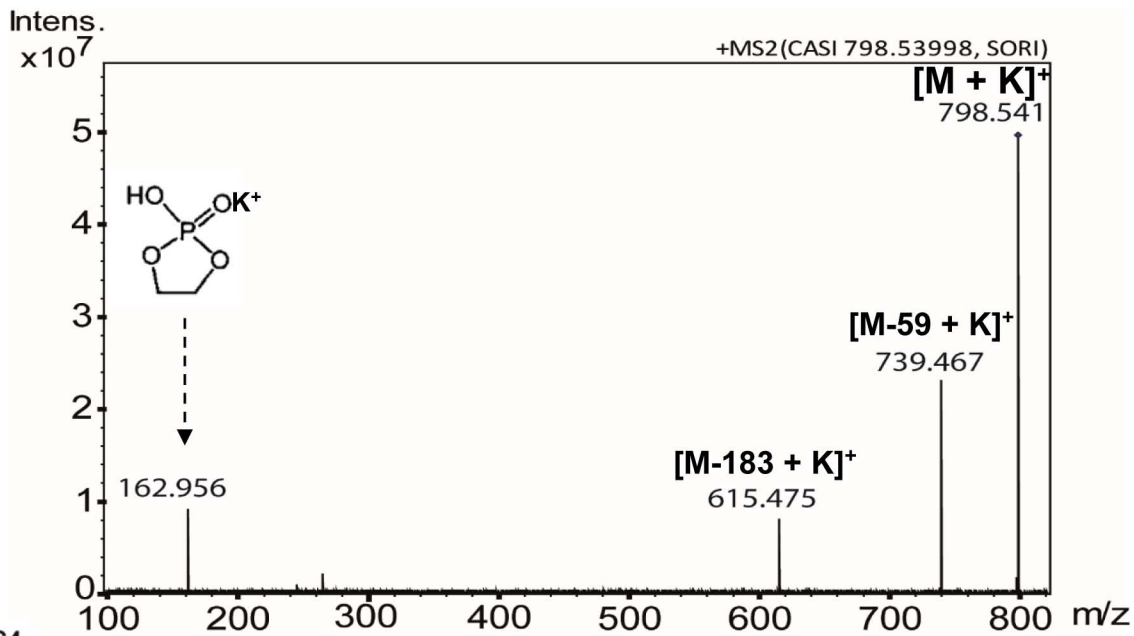

**Fasudil**

*m/z* 292.1114

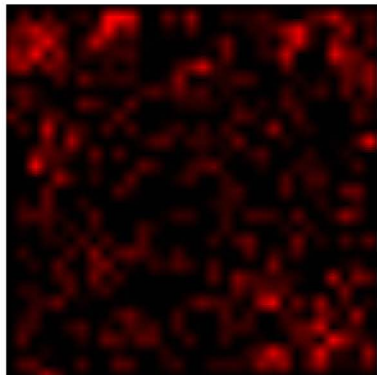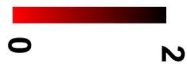

**Hydroxyfasudil**

*m/z* 308.1063

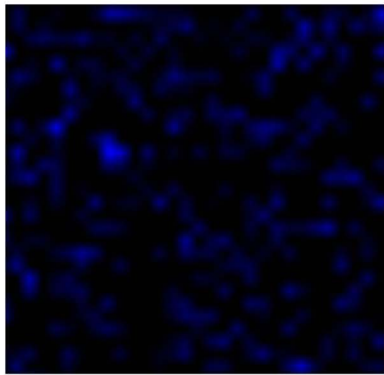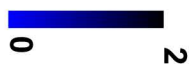

**PC**

*m/z* 798.5410

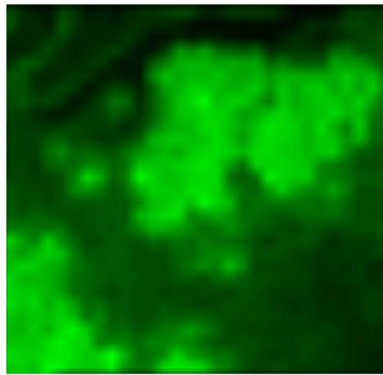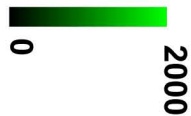

**MERGE**

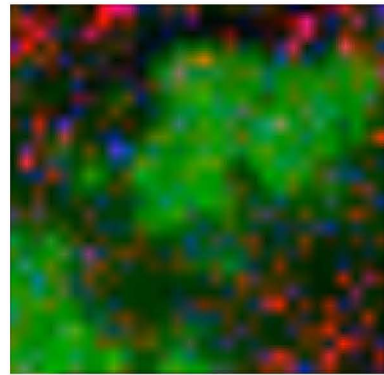

Control  
1

Therapy  
3

3.0

SUV [g/mL]

0.5

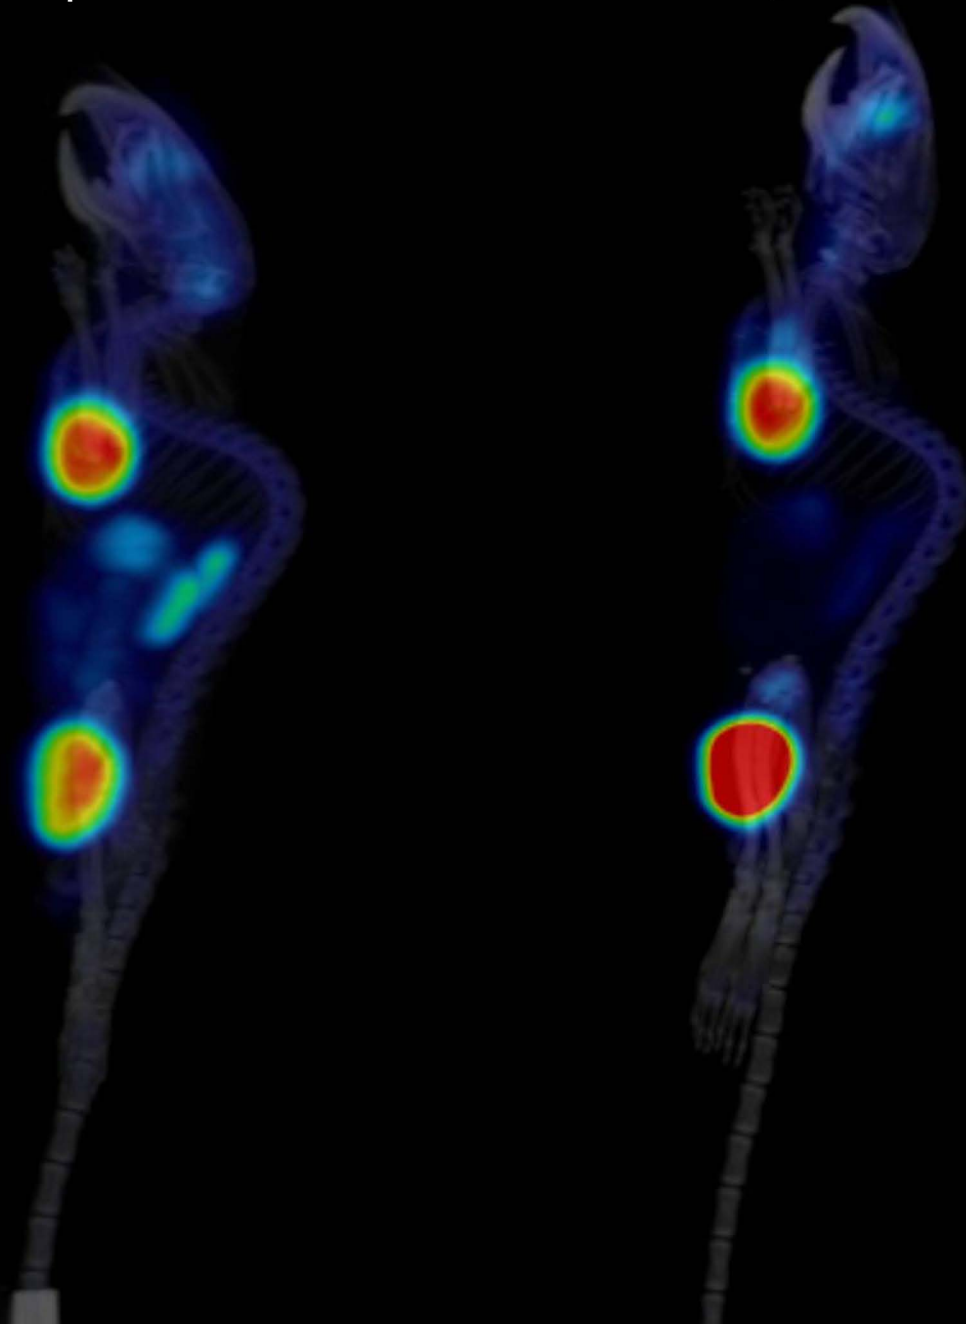

Control  
1

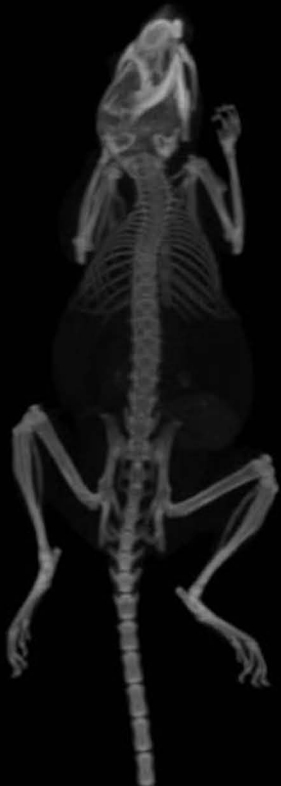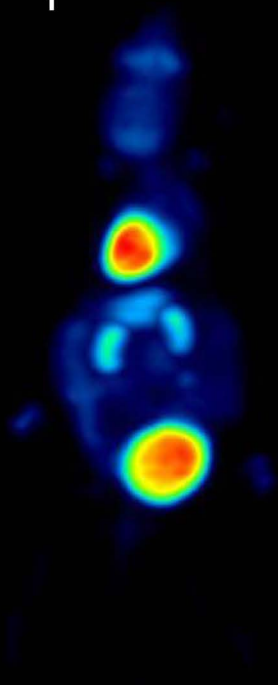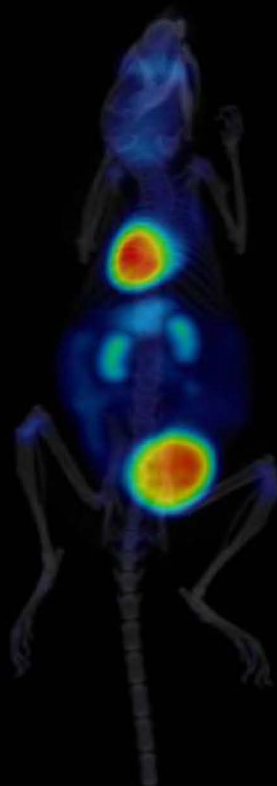

Therapy  
3

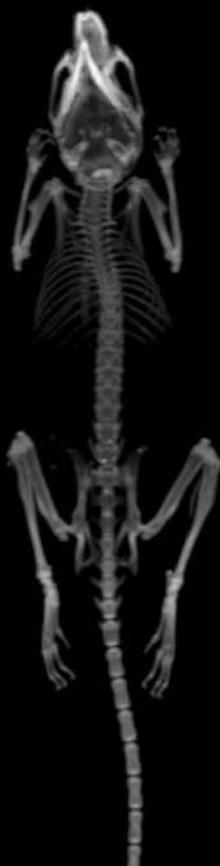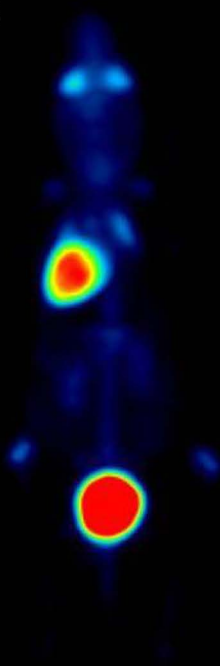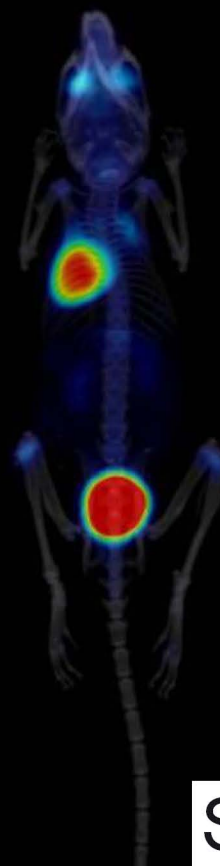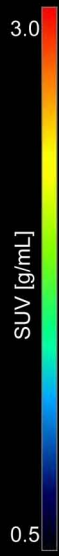



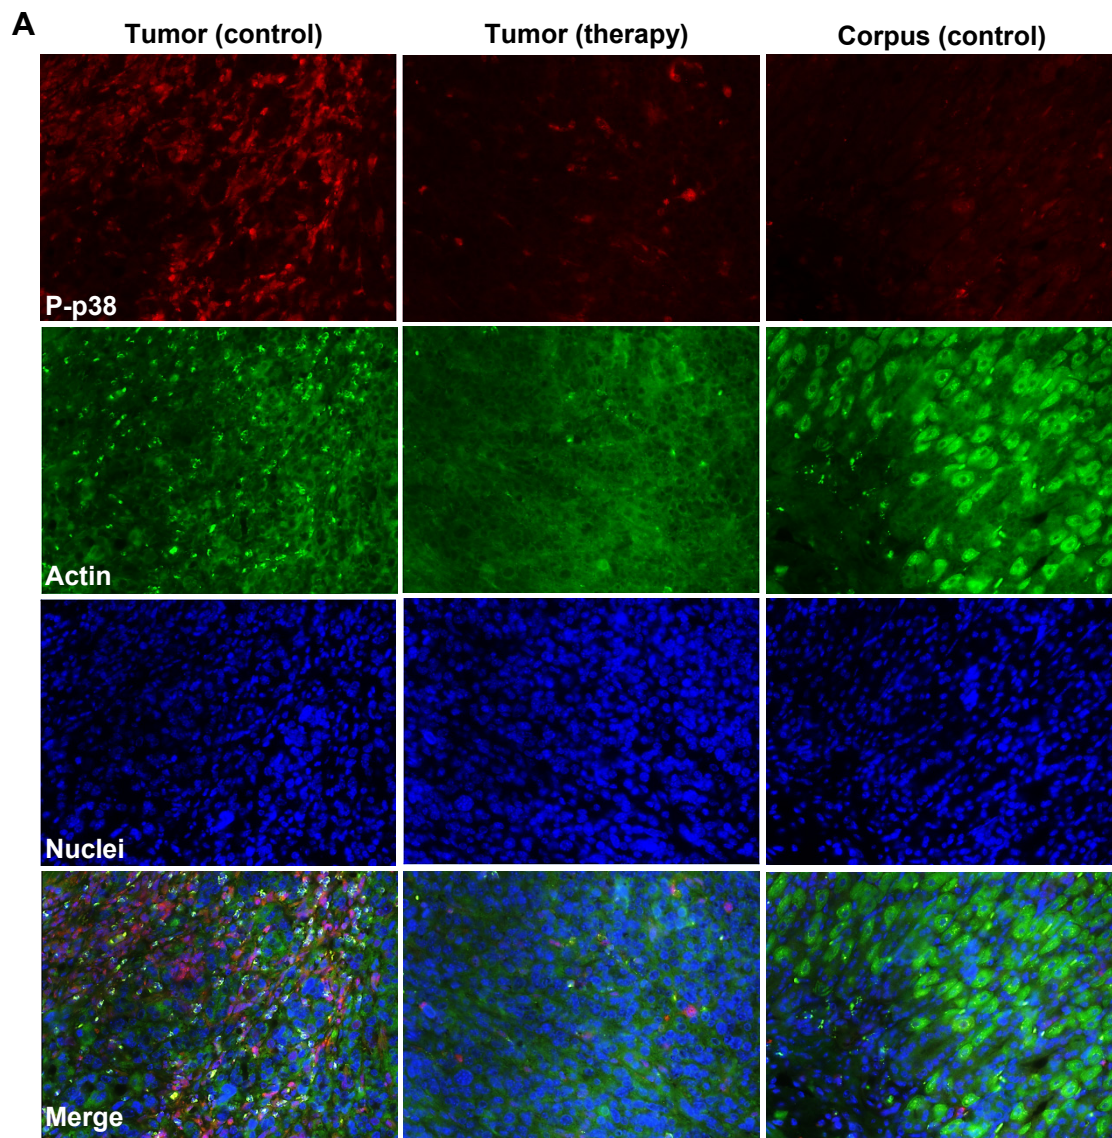



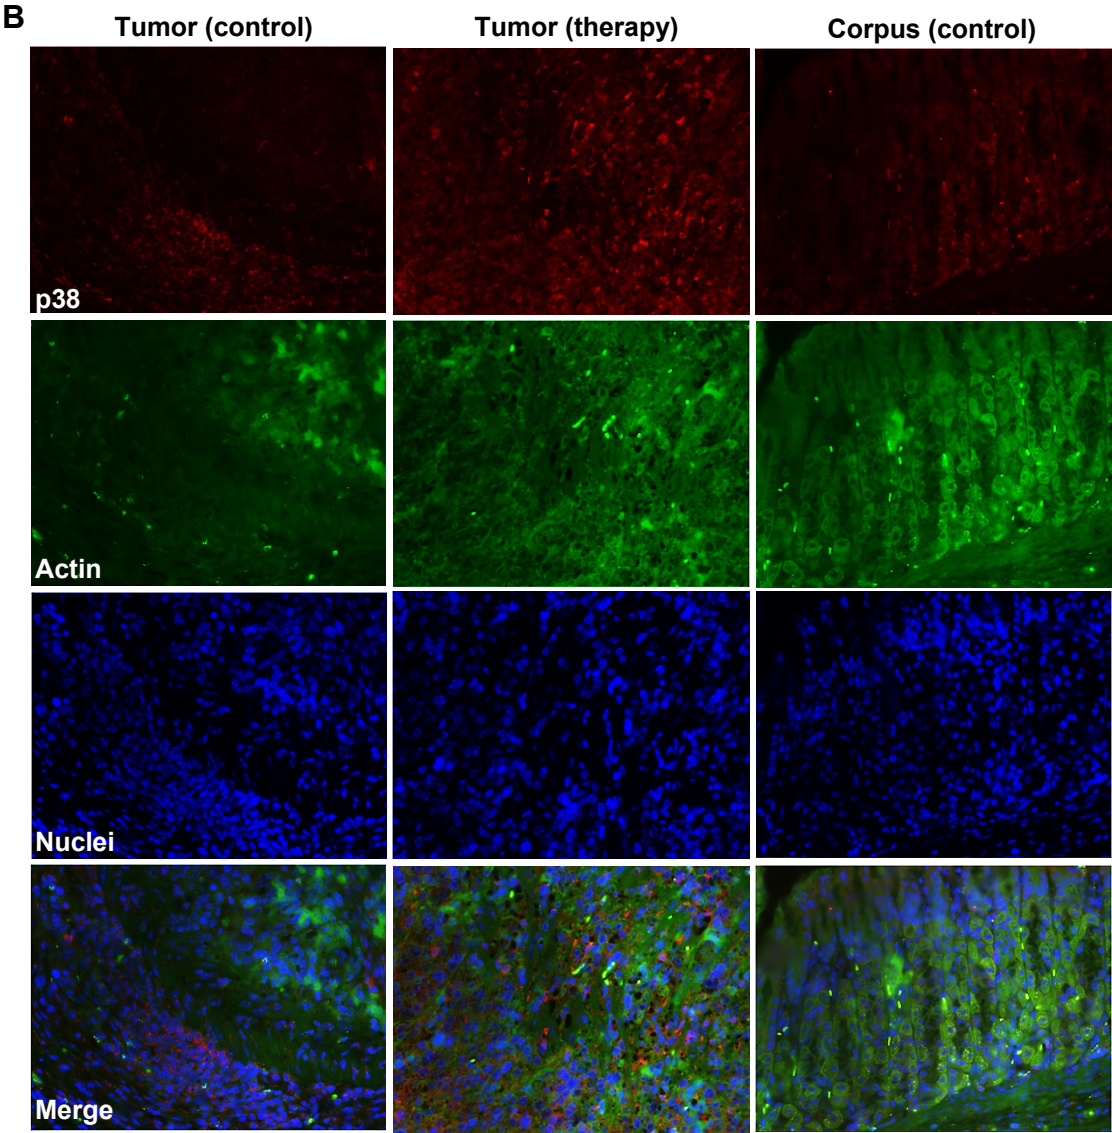

C

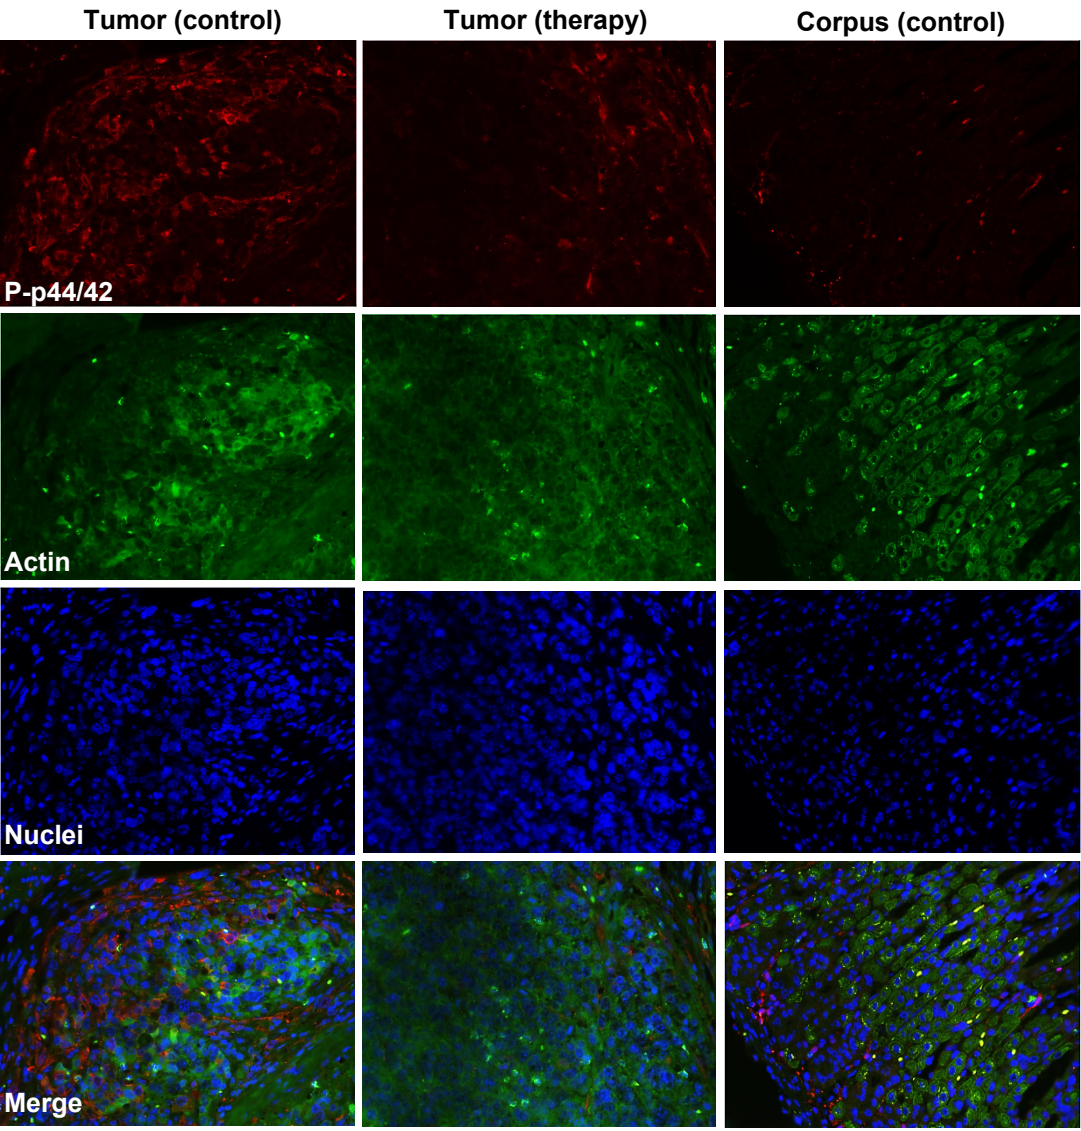



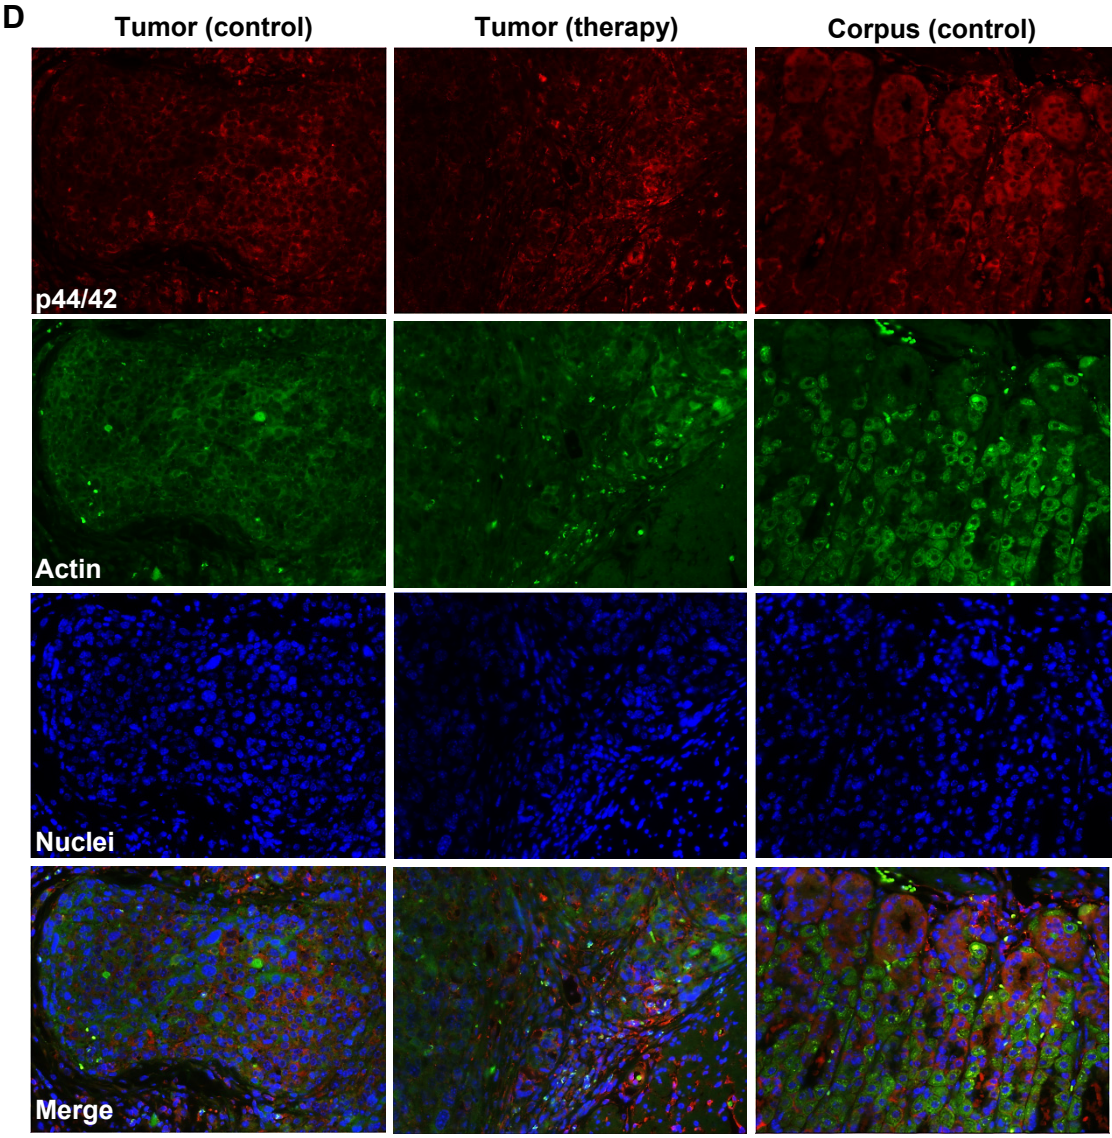

Supplement: mmc4.pdf [file mmc4.pdf]
